# Supplementary material for: Abnormal Antennal Olfactory Sensilla Phenotypes Involved in Olfactory Deficit in Bactrocera correcta (Diptera: Tephritidae)
Source: MDPI journal article supplement (doi:10.3390/insects13060535), 2022-06-10
Supplement: s1 [file s1]

Supplementary Material

# Abnormal antennal olfactory sensilla phenotypes involved in olfactory deficit in *Bactrocera correcta* (Diptera: Tephritidae)

Kai-Fei Guo<sup>a,b,1</sup>, Xiao-Mei Peng<sup>a,1</sup>, Jie-Yu Tu<sup>a,1</sup>, Chan Jin<sup>a</sup>, Wan-Rong Zhang<sup>a</sup>, Xi-Zhu Chen<sup>a</sup>, Yong-Jun Liu<sup>c</sup>, Hong-Guang Zha<sup>d</sup>, Wei Shi<sup>a</sup> and Jun Cao<sup>a,\*</sup>

<sup>a</sup> Yunnan Key Laboratory of Plant Reproductive Adaptation and Evolutionary Ecology and Centre for Invasion Biology, Institute of Biodiversity, School of Ecology and Environmental Science, Yunnan University, Kunming, 650504, Yunnan, China; gkf@ynnu.edu.cn (K.-F.G.); pxm17863997736@163.com (X.-M.P.); luckytutu-tujieyu@163.com (J.-Y.T.); chanooos@163.com (C.J.); zhangwr91@163.com (W.-R.Z.); xzchen334@163.com (X.-Z.C.); shiwei@ynu.edu.cn (W.S.)

<sup>b</sup> School of Chemistry, Biology and Environment, Yuxi Normal University, Yuxi, Yunnan 653100, China

<sup>c</sup> School of Chemical Science and Technology, Yunnan University, Kunming, Yunnan 650504, China; yjliu@ynu.edu.cn (Y.-J.L.)

<sup>d</sup> College of Life and Environment Sciences, Huangshan University, Huangshan, Anhui 245041, China; zhahg@tech.hsu.edu.cn (H.-G.Z.)

<sup>1</sup> Authors contributed equally to the paper

\* Correspondence author: J. Cao, juncao@vip.163.com

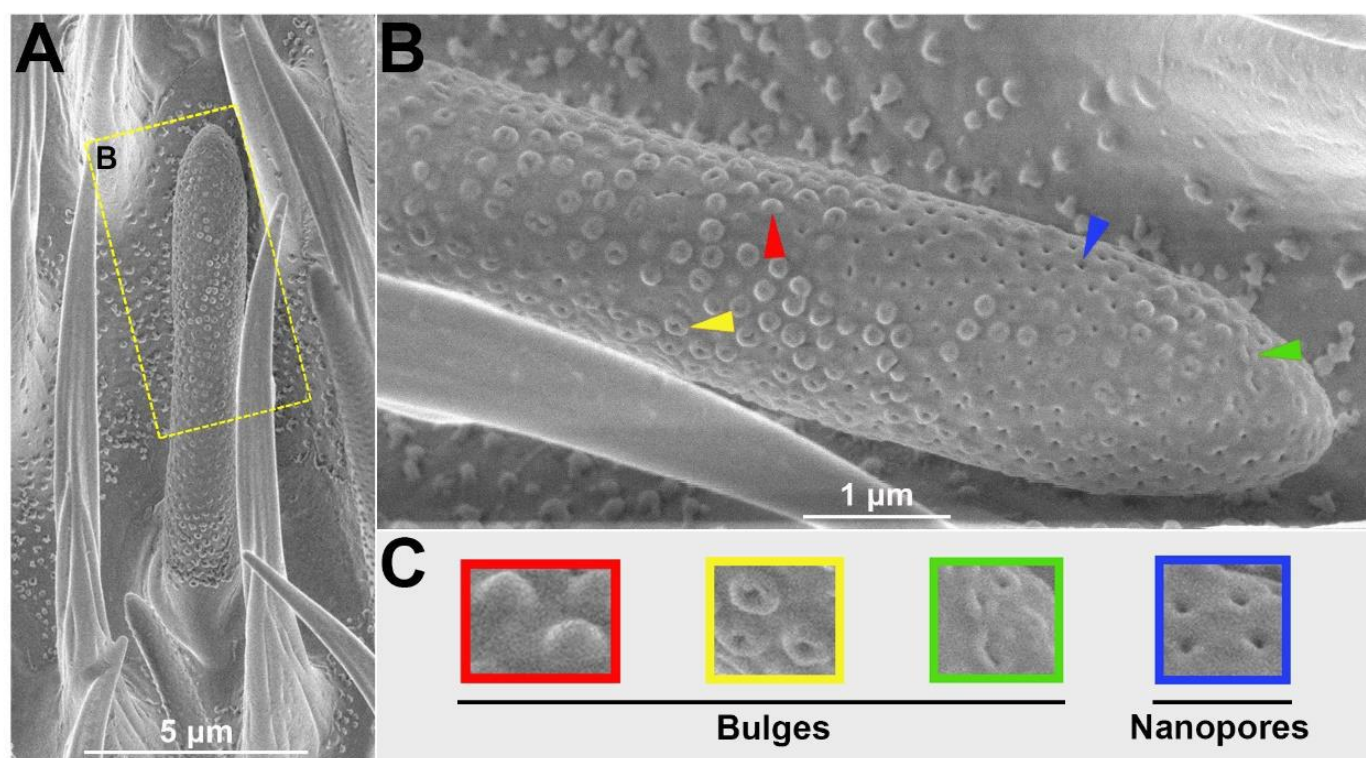

**Figure S1.** Different collapse-like bulges and nanopores coexisted in the single basiconic sensillum in LTC. (A) A SEM image of a basiconic sensillum. (B) Magnified image of a part (yellow dotted box) of the basiconic sensillum, showing full bulges (red arrowhead), slight collapse-like bulges (yellow arrowhead), heavy collapse-like bulges (green arrowhead) and pits (blue arrowhead). (C) Bulge and nanopore images extracted from (B).

**Table S1.** The size of the antennal flagellum in the WC and LTC groups.

| Insects | Antennal flagellum |            |
|---------|--------------------|------------|
|         | Length (µm)        | Width (µm) |

|     |                          |                          |
|-----|--------------------------|--------------------------|
| WC  | 571.9 ± 3.5 <sup>a</sup> | 170.6 ± 2.3 <sup>a</sup> |
| LTC | 566.9 ± 2.5 <sup>a</sup> | 169.9 ± 2.6 <sup>a</sup> |

Values represent means ± standard error, values followed by the same letter on the same column are not significantly different ( $p > 0.05$ ). Sixteen antennae from each group were measured.

**Table S2.** The mean number of five morphological types of antennal olfactory sensilla in the WC and LTC groups.

| Sensilla types | Number of sensilla         |                            |
|----------------|----------------------------|----------------------------|
|                | WC                         | LTC                        |
| Trichoid I     | 1284.7 ± 28.0 <sup>a</sup> | 1294.3 ± 25.2 <sup>a</sup> |
| Trichoid II    | 372.5 ± 5.9 <sup>c</sup>   | 392.7 ± 18.8 <sup>c</sup>  |
| Basiconica I   | 227.8 ± 8.9 <sup>e</sup>   | 245.2 ± 20.4 <sup>e</sup>  |
| Basiconica II  | 423.2 ± 31.6 <sup>b</sup>  | 472.8 ± 28.1 <sup>b</sup>  |
| Grooved        | 318.8 ± 12.8 <sup>d</sup>  | 327.3 ± 19.4 <sup>d</sup>  |

Values represent means ± standard error, values followed by the different letters on the same column are significantly different ( $p < 0.05$ ). Six antennae from each group were examined.

**Table S3.** The mean nanopore number of four morphological types of olfactory sensilla in the WC and LTC groups.

| Sensilla type | Number of nanopores      |                           |
|---------------|--------------------------|---------------------------|
|               | WC                       | LTC                       |
| Trichoid I    | 234.6 ± 5.1 <sup>b</sup> | 118.3 ± 18.3 <sup>b</sup> |
| Trichoid II   | 136.6 ± 2.7 <sup>d</sup> | 74.5 ± 11.6 <sup>c</sup>  |
| Basiconica I  | 426.4 ± 4.4 <sup>a</sup> | 176.8 ± 31.7 <sup>a</sup> |
| Basiconica II | 194.4 ± 4.1 <sup>c</sup> | 112.7 ± 16.9 <sup>b</sup> |

Values represent means ± standard error, values followed by the different letters on the same column are significantly different ( $p < 0.05$ ). Twenty sensilla from each type of sensilla were examined.

**Table S4.** The EAG responses of the WC and LTC groups to two odorants.

| Insects | EAG responses (mV)       |                          |
|---------|--------------------------|--------------------------|
|         | Methyl eugenol           | β-caryophyllene          |
| WC      | 1.46 ± 0.13 <sup>a</sup> | 1.35 ± 0.11 <sup>a</sup> |
| LTC     | 0.53 ± 0.05 <sup>b</sup> | 0.42 ± 0.05 <sup>b</sup> |

Values represent means ± standard error, values followed by the different letters on the same column are significantly different ( $p < 0.001$ ). Fifteen insects from WC or LTC were respectively used for EAG recording to each odorant.

**Table S5.** The total response rate and right response rate of the WC and LTC groups to two odorants.

| Insects | Total response rate (%) |                         | Right response rate (%) |                         |
|---------|-------------------------|-------------------------|-------------------------|-------------------------|
|         | Methyl eugenol          | β-caryophyllene         | Methyl eugenol          | β-caryophyllene         |
| WC      | 90.8 ± 3.0 <sup>a</sup> | 93.3 ± 2.5 <sup>a</sup> | 83.3 ± 2.1 <sup>a</sup> | 80.8 ± 2.4 <sup>a</sup> |
| LTC     | 55.0 ± 3.7 <sup>b</sup> | 60.0 ± 2.9 <sup>b</sup> | 43.3 ± 2.1 <sup>b</sup> | 48.3 ± 2.1 <sup>b</sup> |

Values represent means ± standard error, values followed by the different letters on the same column are significantly different ( $p < 0.001$ ). Six replications from WC or LTC were respectively used for behavioral bioassay to each odorant.
